# Supplementary material for: X-chromosome and kidney function: evidence from a multi-trait genetic analysis of 908,697 individuals reveals sex-specific and sex-differential findings in genes regulated by androgen response elements
Source: PubMed Central journal article supplement (PMC10794254; doi:10.1038/s41467-024-44709-1), 2024-01-18
Supplement: 41467_2024_44709_MOESM3_ESM.pdf [file 41467_2024_44709_MOESM3_ESM.pdf]

## **Description of Additional Supplementary Files**

File name: Supplementary Data 1

Description: Description of participating studies: study design and phenotype distribution.

File name: Supplementary Data 2

Description: Genotyping and imputation information of participating studies.

File name: Supplementary Data 3

Description: Number of data sets, samples and SNPs contributing to the different association analyses.

File name: Supplementary Data 4

Description: Comparisons between sexes of the 23 index SNPs.

File name: Supplementary Data 5a

Description: Comparisons between phenotypes (look up in all seven kidney traits in the respective top-associated sub-group).

File name: Supplementary Data 5b

Description: Comparisons between phenotypes (look up for all seven kidney traits and all analysis groups).

File name: Supplementary Data 5c

Description: Comparisons between phenotypes (colocalization analyses of physically overlapping loci associated with eGFR respectively UA).

File name: Supplementary Data 6

Description: Independent variants per locus and analysis group.

File name: Supplementary Data 7

Description: Annotation of 99% Credible Sets.

File name: Supplementary Data 8

Description: Co-localization of genetic association signals and eQTLs.

File name: Supplementary Data 9

Description: Validation of eGFR associations in HUNT.

File name: Supplementary Data 10

Description: Look-up of SNPs previously reported for UA, eGFR, creatinine and BUN.

File name: Supplementary Data 11

Description: Results of meta-regression analysis of the 23 index SNPs.

File name: Supplementary Data 12

Description: Additional genome-wide significant associations due to meta-regression.

File name: Supplementary Data 13

Description: Look-up of sex-biased gene-expressions of candidate genes assigned to genetic sex-interactions.

File name: Supplementary Data 14

Description: Co-localization of genetic association signals of CKD traits and testosterone.

File name: Supplementary Data 15

Description: Look-up of eQTL effect directions in case of positive co-localization.
